# Supplementary material for: Lung macrophage scavenger receptor SR-A6 (MARCO) is an adenovirus type-specific virus entry receptor
Source: PubMed Central journal article supplement (PMC5862501; doi:10.1371/journal.ppat.1006914), 2018-03-09

# S1 Fig

## A anti-SR-A6-FACS of SR-A6<sup>+/+</sup> and <sup>-/-</sup> MPI cells

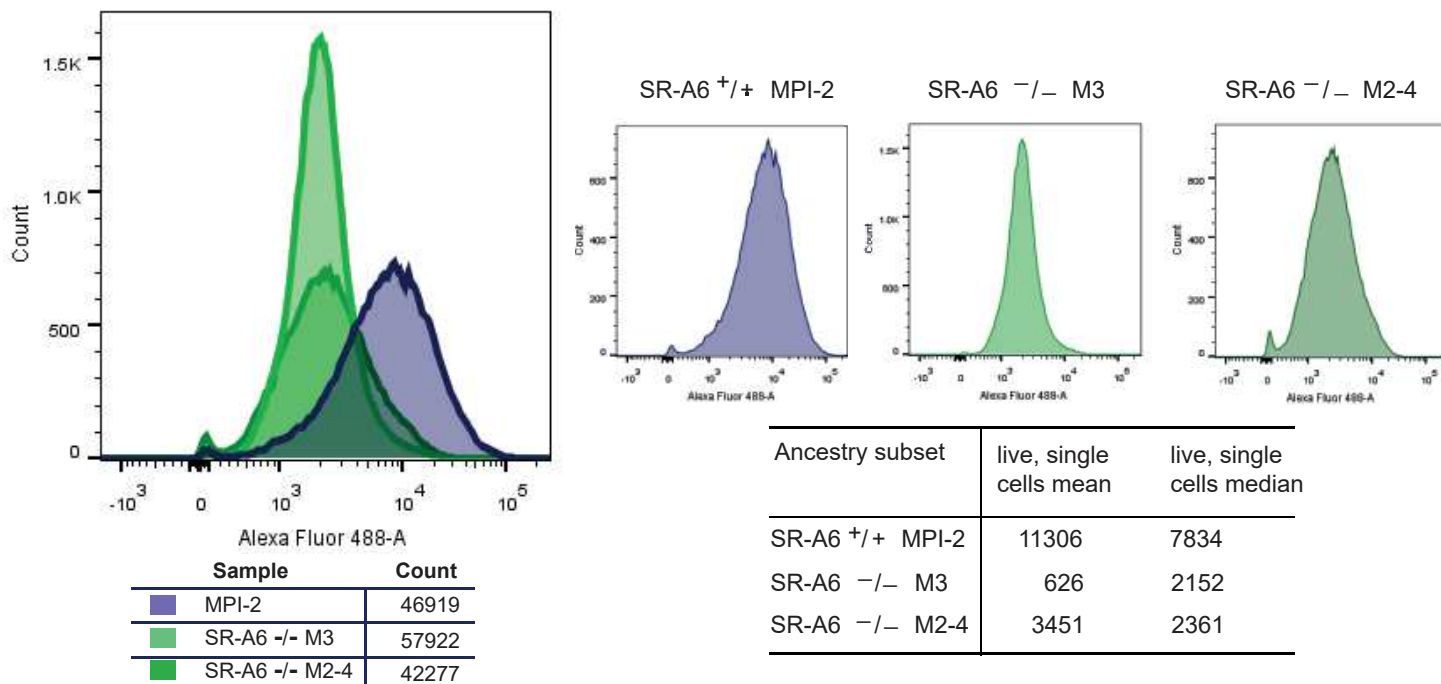

## B qRT-PCR of SR-A6<sup>+/+</sup> and <sup>-/-</sup> MPI cells

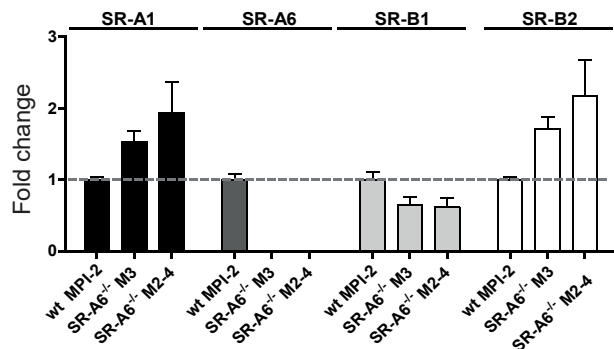

## C Secretion of IFN $\alpha/\beta$ from control shRNA-transfected cells

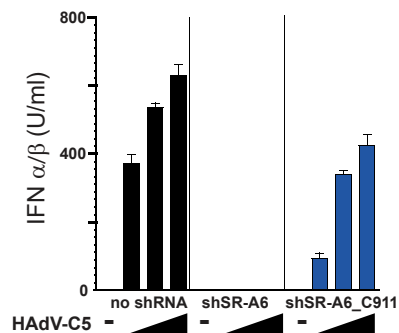

Supplement: ppat.1006914.s001.pdf [file ppat.1006914.s001.pdf]
