# Supplementary material for: Lung macrophage scavenger receptor SR-A6 (MARCO) is an adenovirus type-specific virus entry receptor
Source: PubMed Central journal article supplement (PMC5862501; doi:10.1371/journal.ppat.1006914), 2018-03-09

## S2 Fig

### A HAdV-C5 binding to shSR-treated MPI-2 cells

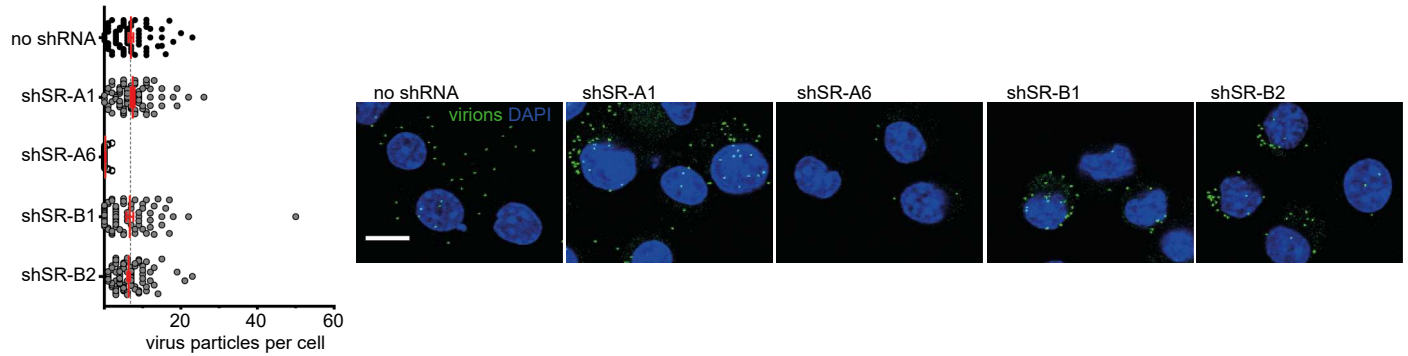

### B Virion binding to shSR-A6\_C911 MPI-2 cells

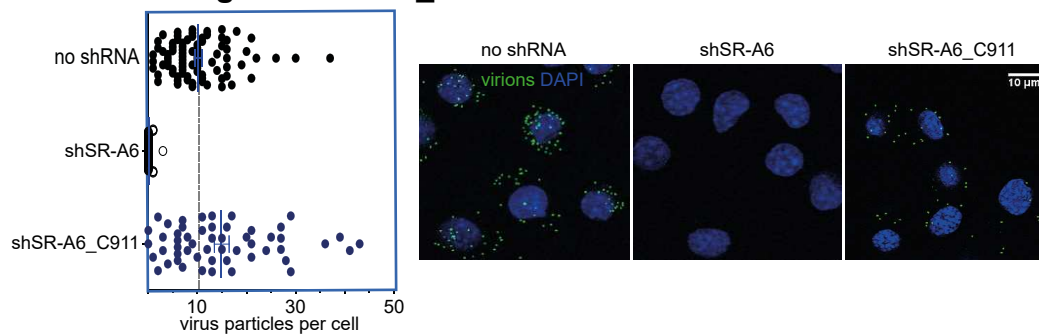

### C HAdV-B3 binding to MPI-2 and A549 cells

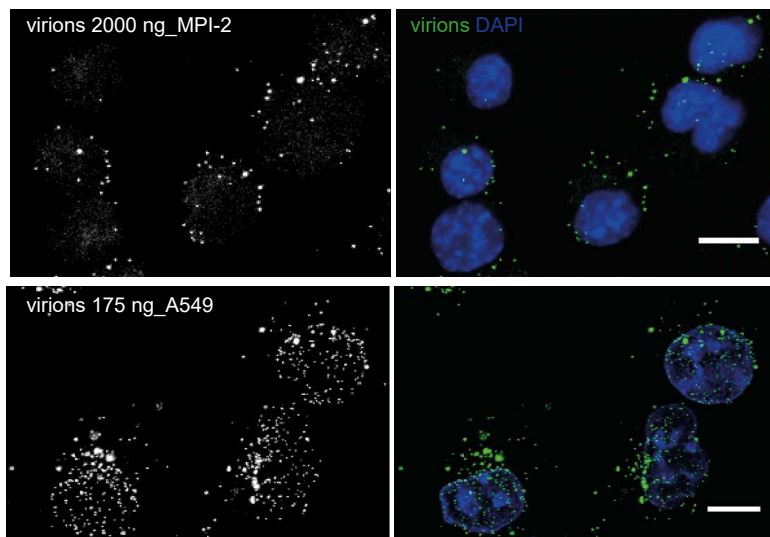

### D HAdV-B3 incubated with soluble SR-A6

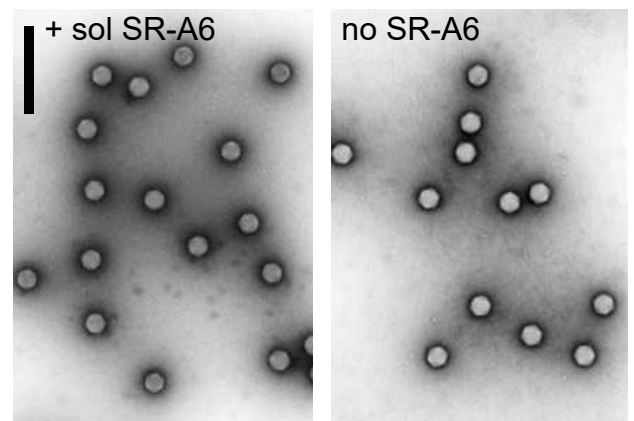

Supplement: ppat.1006914.s002.pdf [file ppat.1006914.s002.pdf]
