# Supplementary material for: Lung macrophage scavenger receptor SR-A6 (MARCO) is an adenovirus type-specific virus entry receptor
Source: PubMed Central journal article supplement (PMC5862501; doi:10.1371/journal.ppat.1006914), 2018-03-09

# S3 Fig

## A Virus amounts analyzed by SDS-PAGE & silver staining

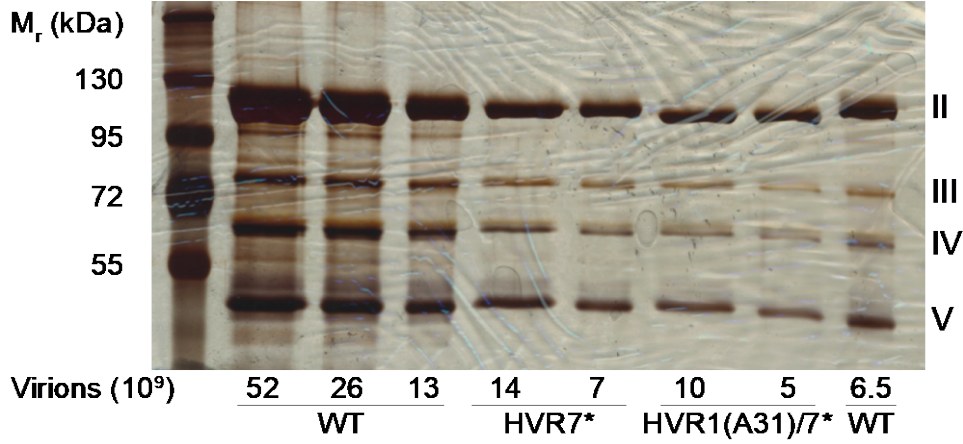

## B Effect of hexon HVR1 on binding of HAdV-C5 to cells

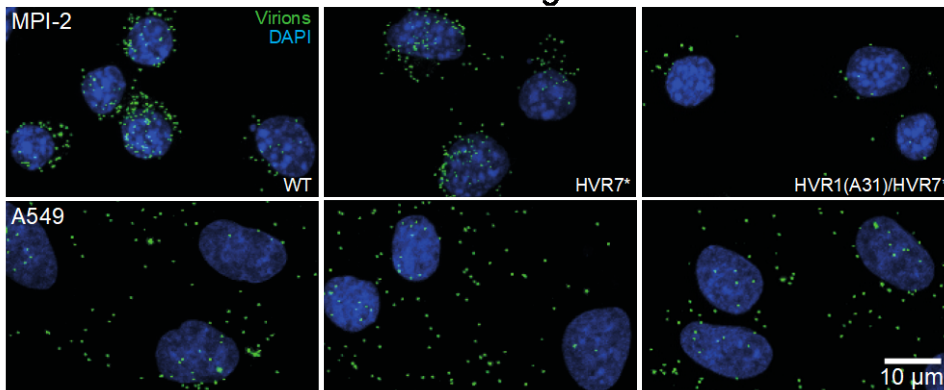

## C Effect of hexon HVR1 on binding of HAdV-C5 to MPI cells, and binding of HAdV-A31 on MPI cells

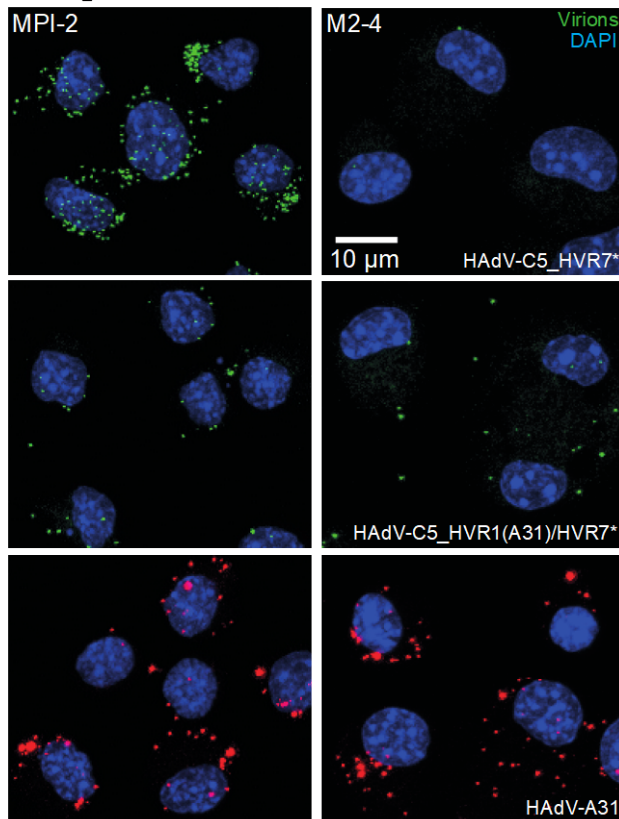

Supplement: ppat.1006914.s003.pdf [file ppat.1006914.s003.pdf]
