# Supplementary material for: Lung macrophage scavenger receptor SR-A6 (MARCO) is an adenovirus type-specific virus entry receptor
Source: PubMed Central journal article supplement (PMC5862501; doi:10.1371/journal.ppat.1006914), 2018-03-09

# S4 Fig

## A Protein VI exposure

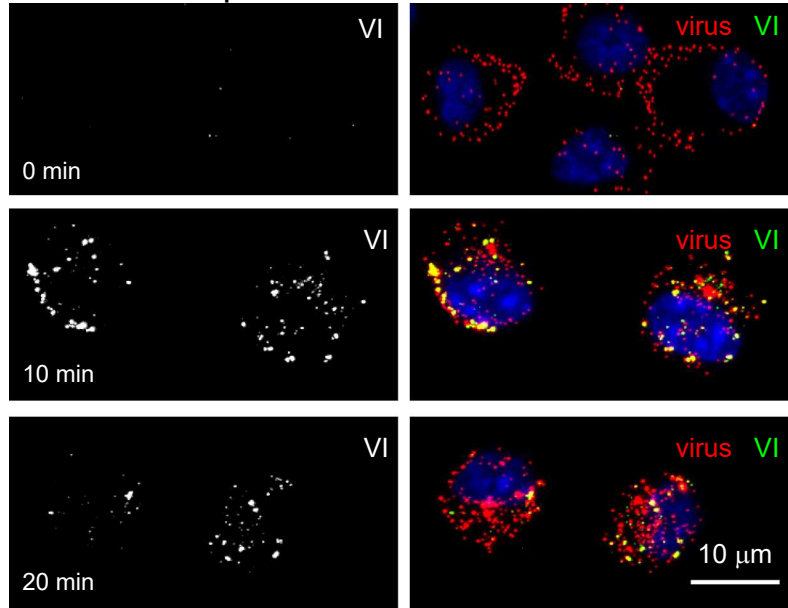

## B Incoming HAdV-C5 DNA detected by Click-reaction

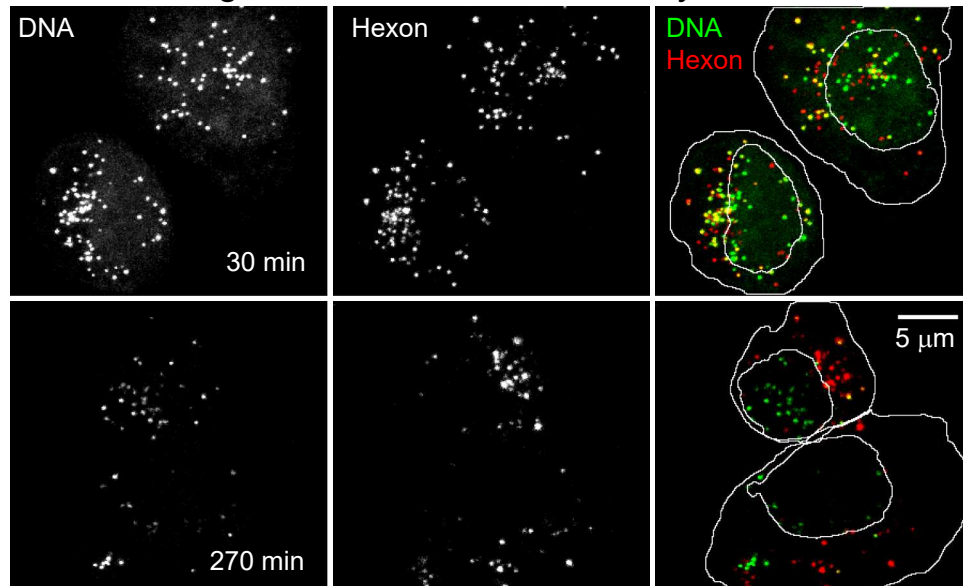

Supplement: ppat.1006914.s004.pdf [file ppat.1006914.s004.pdf]
