# Supplementary material for: Lung macrophage scavenger receptor SR-A6 (MARCO) is an adenovirus type-specific virus entry receptor
Source: PubMed Central journal article supplement (PMC5862501; doi:10.1371/journal.ppat.1006914), 2018-03-09

## S5 Fig

Binding of HAdV-C5, HAdV-B35 and HAdV-D26 to MPI-2 cells

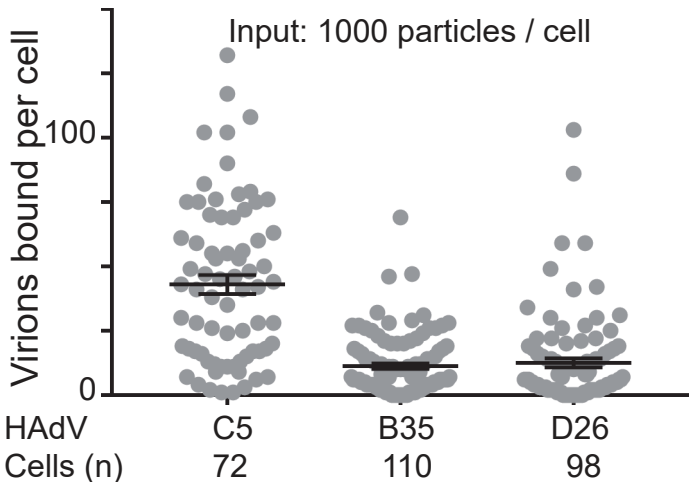

Supplement: ppat.1006914.s005.pdf [file ppat.1006914.s005.pdf]
