# Supplementary material for: Lung macrophage scavenger receptor SR-A6 (MARCO) is an adenovirus type-specific virus entry receptor
Source: PubMed Central journal article supplement (PMC5862501; doi:10.1371/journal.ppat.1006914), 2018-03-09

**S6 Fig** Surface expression of human SR-A6 in transfected HDF-TERT cells

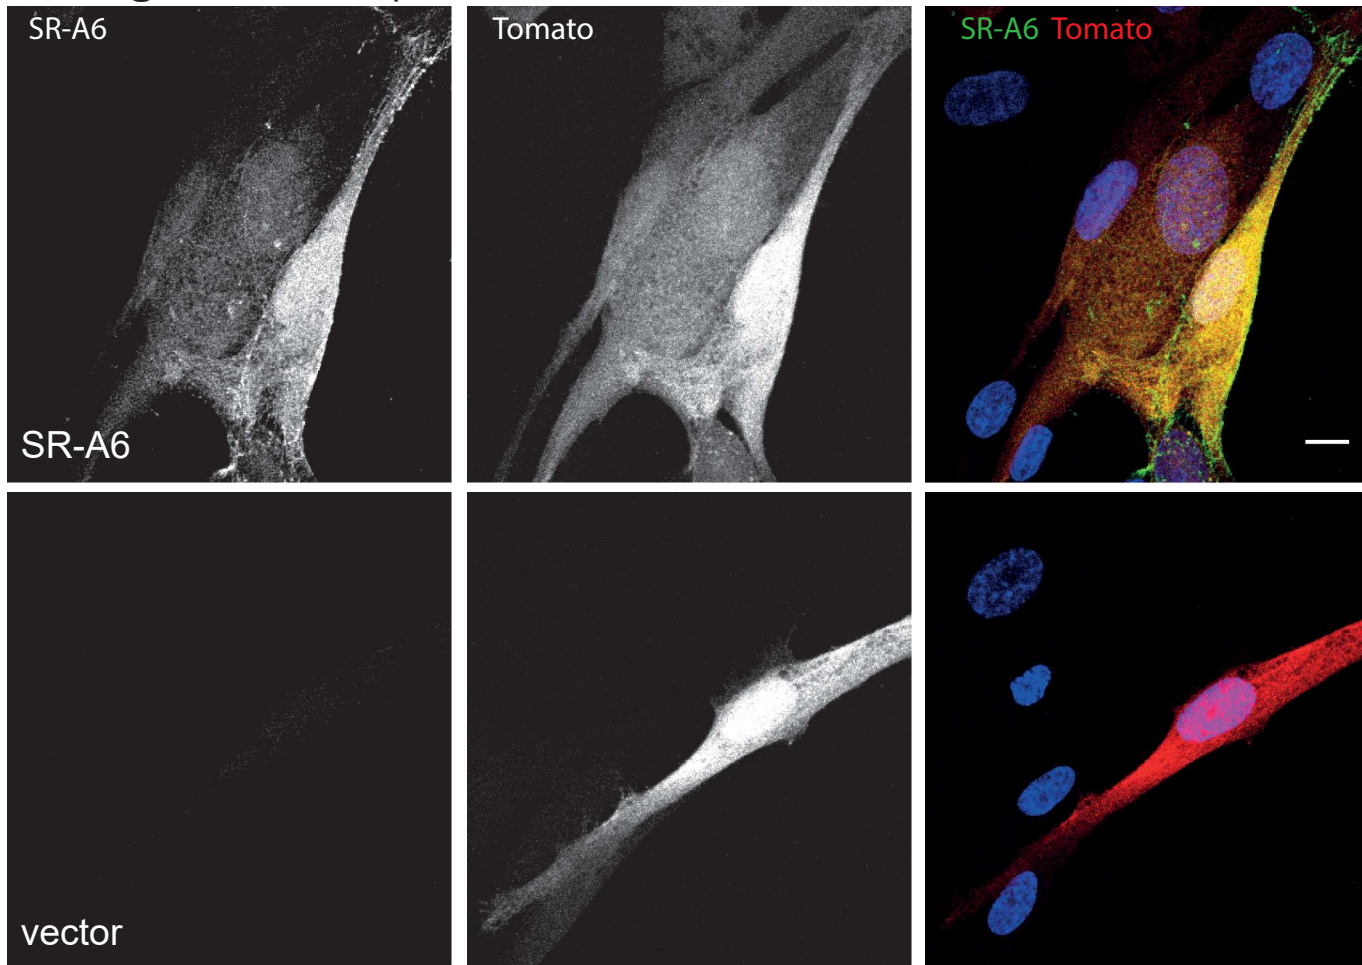

Supplement: ppat.1006914.s006.pdf [file ppat.1006914.s006.pdf]
