# Supplementary material for: Lung macrophage scavenger receptor SR-A6 (MARCO) is an adenovirus type-specific virus entry receptor
Source: PubMed Central journal article supplement (PMC5862501; doi:10.1371/journal.ppat.1006914), 2018-03-09
Supplement: ppat.1006914.s008.pdf [file ppat.1006914.s008.pdf]

## S2 Table: Oligonucleotides used for qRT-PCR

|         |                                                               |
|---------|---------------------------------------------------------------|
| mSR-A1  | 5'-TGCTGTCTTCTTTACCAGCA-3'<br>5'-TGAAGGGAGGGGCCATTTTT-3'      |
| mSR-A6  | 5'-AGGAAGACTTCTTGGGCAGC-3'<br>5'-GAGCAGGATCAGGTGGATGG-3'      |
| mSR-B1  | 5'-GCCCCAGGTTCTTCACTACG-3'<br>5'-TCCTCAAGAAGCGGGGTGTA-3'      |
| mSR-B2  | 5'-CAGCTCATACATTGCTGTTTATGC-3'<br>5'-ACTGGTTTTCTCGCCAACTC-3'  |
| mEEF1A1 | 5'-TCCACTTGGTCGCTTTGCT-3'<br>5'-CTTCTTGCCACAGCTTTGATGA-3'     |
| mTBP    | 5'-TTGACCTAAAGACCATTGCACTTC-3'<br>5'-TTCTCATGATGACTGCAGCAA-3' |
| mGAPDH  | 5'-TGGAGTCTACTGGTGTCTTCAC-3'<br>5'-TTTTGGCTCCACCCTTCAAG-3'    |
