# Supplementary material for: Lung macrophage scavenger receptor SR-A6 (MARCO) is an adenovirus type-specific virus entry receptor
Source: PLoS Pathog. 2018 Mar 9;14(3):e1006914. doi: 10.1371/journal.ppat.1006914 (PMC5862501; doi:10.1371/journal.ppat.1006914)
Supplement: S7 Fig — A) Ad5 hexon (PDB ID code 6B1T) is depicted in blue and ribbon corresponding to residues WDEAATALEINLEEEDDDNEDEVDEQAEQQKTHVFGQ, including the HVR1 as defined by [1, 2], is highlighted in red using the molecular visualization program UCSF Chimera. The stretch of amino acids which appears to influence SR-A6 binding is exposed on the surface near the rim of the cup formed in the hexon trimer. B) The HVR1 hexon loops of HAdV-C2 and HAdV-C5 were assigned according to [1], and are indicated in red and acidic residues in green. The sequence alignment was done using Clustal Omega at EMBL-EBI [3]. (PDF) [file ppat.1006914.s007.pdf]

## S7 Fig

### A HVR1 location on hexon

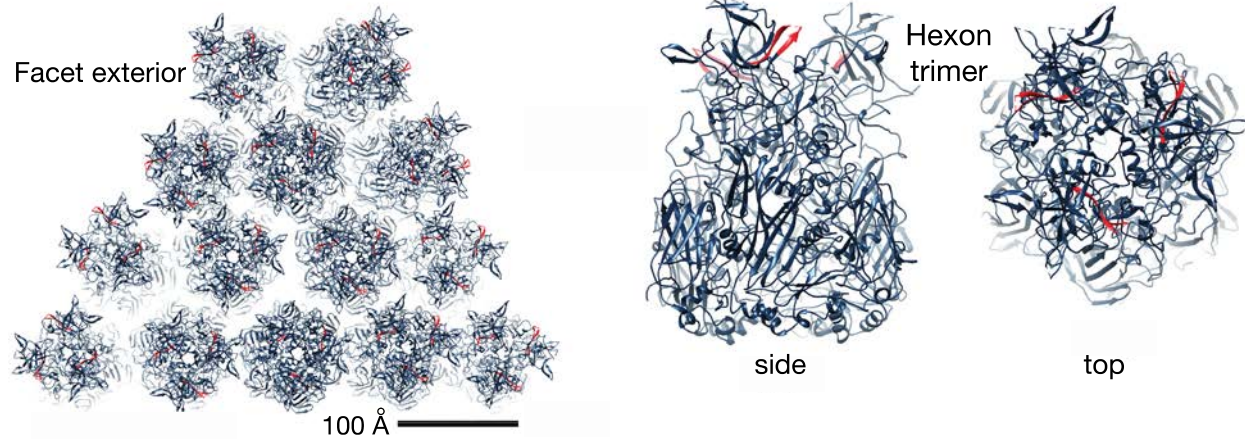

### B Alignment of HVR1 sequences

|      |     |                                      | HVR1                               |                  |
|------|-----|--------------------------------------|------------------------------------|------------------|
| HAdV | C2  | YNALAPKGAPNSCEWEQT                   | EDSGRAVAEDEEEDEDEEEEEEQNARDQATKKTH | VYAQAP           |
|      | C5  | YNALAPKGAPNPCEWDEAATALEINLEEDDDNEDEV | -----DEQAEQQKTH                    | VFGQAP           |
|      | B3  | YNSLAPKGAPNTSQWIVTTNGDNAV            | -----                              | TTTTNTFGIAS      |
|      | B35 | YNSLAPKGAPNASQWIAGVPTAAAAGNGEEE      | -----                              | HETEEKTATYTFANAP |
|      | D26 | YNSLAPKGAPNPSQWETKEKQGTG             | -----                              | GVQQEKDVTKTFGVAA |
|      | A31 | YNSLAPKGAPNASQWLTTNNGNK              | -----                              | THTFQAP          |
